# Supplementary material for: Generation of Differentiating and Long-Living Intestinal Organoids Reflecting the Cellular Diversity of Canine Intestine
Source: MDPI journal article supplement (doi:10.3390/cells9040822), 2020-03-28
Supplement: s1 [file s1]

**Table S1: qPCR primer specifications used in this study**

A summary of all primer sequences that were used, including GeneBank accession numbers and amplicon sizes.

| Gene           | GeneBank Accession № | 5'-3' primer sequence                                      | Amplicon size (bp) |
|----------------|----------------------|------------------------------------------------------------|--------------------|
| <b>ASCL2</b>   | XM_005631346.3       | F: GTGAAGCTGGTGAAC TTGG<br>R: CACCTTACTCAGCTTCTTGC         | 81                 |
| <b>BMI1</b>    | NM_001287063.1       | F: GAACAACCAGAATCAAGATCAC<br>R: GGTCTCCAAGTAACGCAC         | 140                |
| <b>CHGA</b>    | XR_002628933.1       | F: GGTCTGGCTCTGTTGTTCC<br>R: CTCGCGAGAAAAGACAACCG          | 196                |
| <b>EPHB2</b>   | XM_005617823         | F: CTGCCACTCATCATCGGCTC<br>R: CCCCCGTCTTCTGTTACACAC        | 90                 |
| <b>HPRT</b>    | NM_001003357.2       | F: CCCAGCGTCGTGATTAGTG<br>R: ACACTTTTTCCAAATCCTCAGCG       | 92                 |
| <b>LGR5</b>    | XM_014117119.2       | F: CTCAGCGTCTTCACCTCCT<br>R: TGGGAATGTATGTCAAAGCGT         | 130                |
| <b>MUC2</b>    | XM_022405513.1       | F: TCCTCTACCCTCGTCTACTGC<br>R: GACGGGCATGACCAGTTGAA        | 149                |
| <b>NEUROG3</b> | XM_546140.2          | F: AAAGGCCGGCTCATCCTAAC<br>R: TCGTAGGTCCCTTGGACAGT         | 116                |
| <b>NOTCH1</b>  | XM_005625433.1       | F: TACCGGCCAGAACTGTGAGGAGAA<br>R: GGAGGGCAGCGGCAGTTGTAAGTA | 108                |
| <b>PROM1</b>   | NM_001314109.1       | F: CTGGGGCTGCTCTTTGTGAT<br>R: AGGCCCCATTTTTCTTCTGTC        | 115                |
| <b>VIL1</b>    | XM_545642.5          | F: TGCCAACACCAAGAGATTGC<br>R: GCAGGAACACATCGTCCTCT         | 143                |

**Table S2: Statistical analysis of duodenal tissue vs. duodenal organoids**

Two-way ANOVA, Tukey multiple comparisons of mean, 95 % family-wise confidence level; i.c.i., initial cell isolates;  $p \geq 10$ , organoids in passage higher or equal 10;  $p \leq 5$ , organoids in passage less or equal 5; code: 0 \*\*\* 0.001 \*\* 0.01 \* 0.05 . 0.1

| <b>LGR5</b>        | <b>Df</b> | <b>Sum Sq</b> | <b>Mean Sq</b> | <b>F value</b> | <b>Pr(&gt;F)</b> |
|--------------------|-----------|---------------|----------------|----------------|------------------|
| <b>Medium</b>      | 2         | 28.7511       | 14.3755        | 13.271         | 0.01715 *        |
| <b>Individuals</b> | 2         | 27.6783       | 13.8392        | 12.776         | 0.01832 *        |
| <b>Residuals</b>   | 4         | 4.3329        | 1.0832         |                |                  |

**multiple comparisons - Medium**

| <b>LGR5</b>                                         | <b>diff</b> | <b>lwr</b> | <b>upr</b> | <b>p adj</b> |
|-----------------------------------------------------|-------------|------------|------------|--------------|
| <b><math>p \geq 10</math>-i.c.i.</b>                | 4.342488    | 1.313815   | 7.3711615  | 0.0151270    |
| <b><math>p \leq 5</math>-i.c.i.</b>                 | 1.688923    | -1.339750  | 4.7175961  | 0.2305607    |
| <b><math>p \leq 5</math>-<math>p \geq 10</math></b> | -2.653565   | -5.682239  | 0.3751076  | 0.0743799    |

**multiple comparisons - Individuals**

| <b>LGR5</b>  | <b>diff</b> | <b>lwr</b>  | <b>upr</b> | <b>p adj</b> |
|--------------|-------------|-------------|------------|--------------|
| <b>#2-#1</b> | 2.986453    | -0.04221994 | 6.015126   | 0.0522168    |
| <b>#3-#1</b> | 4.167174    | 1.13850073  | 7.195847   | 0.0174639    |
| <b>#3-#2</b> | 1.180721    | -1.84795239 | 4.209394   | 0.4271312    |

| <b>VIL1</b>        | <b>Df</b> | <b>Sum Sq</b> | <b>Mean Sq</b> | <b>F value</b> | <b>Pr(&gt;F)</b> |
|--------------------|-----------|---------------|----------------|----------------|------------------|
| <b>Medium</b>      | 2         | 40.755        | 20.3777        | 44.219         | 0.001873 **      |
| <b>Individuals</b> | 2         | 3.219         | 1.6097         | 3.493          | 0.132570         |
| <b>Residuals</b>   | 4         | 1.843         | 0.4608         |                |                  |

**multiple comparisons - Medium**

| <b>VIL1</b>                                         | <b>diff</b> | <b>lwr</b> | <b>upr</b> | <b>p adj</b> |
|-----------------------------------------------------|-------------|------------|------------|--------------|
| <b><math>p \geq 10</math>-i.c.i.</b>                | -4.967003   | -6.9424487 | -2.991557  | 0.0019050    |
| <b><math>p \leq 5</math>-i.c.i.</b>                 | -3.852572   | -5.8280183 | -1.877126  | 0.0049694    |
| <b><math>p \leq 5</math>-<math>p \geq 10</math></b> | 1.114430    | -0.8610156 | 3.089876   | 0.2250584    |

**multiple comparisons - Individuals**

| <b>VIL1</b>  | <b>diff</b> | <b>lwr</b> | <b>upr</b> | <b>p adj</b> |
|--------------|-------------|------------|------------|--------------|
| <b>#2-#1</b> | -0.028771   | -2.0042166 | 1.946675   | 0.9985162    |
| <b>#3-#1</b> | 1.254108    | -0.7213381 | 3.229554   | 0.1732968    |
| <b>#3-#2</b> | 1.282879    | -0.6925675 | 3.258325   | 0.1642985    |

Table S2 (continued)

| <i>CHGA</i> | Df | Sum Sq  | Mean Sq | F value | Pr(>F)   |    |
|-------------|----|---------|---------|---------|----------|----|
| Medium      | 2  | 186.757 | 93.379  | 18.7766 | 0.009266 | ** |
| Individuals | 2  | 9.771   | 4.885   | 0.9823  | 0.449727 |    |
| Residuals   | 4  | 19.893  | 4.973   |         |          |    |

## multiple comparisons - Medium

| <i>CHGA</i>            | diff        | lwr        | upr       | p adj     |
|------------------------|-------------|------------|-----------|-----------|
| p $\geq$ 10-i.c.i.     | -9.67218414 | -16.161613 | -3.182755 | 0.0131975 |
| p $\leq$ 5-i.c.i.      | -9.65431161 | -16.143740 | -3.164883 | 0.0132841 |
| p $\leq$ 5-p $\geq$ 10 | 0.01787253  | -6.471556  | 6.507301  | 0.9999469 |

## multiple comparisons - Individuals

| <i>CHGA</i> | diff     | lwr       | upr      | p adj     |
|-------------|----------|-----------|----------|-----------|
| #2-#1       | 1.162652 | -5.326777 | 7.652081 | 0.8083221 |
| #3-#1       | 2.548925 | -3.940504 | 9.038353 | 0.4227062 |
| #3-#2       | 1.386273 | -5.103156 | 7.875701 | 0.7437583 |

| <i>MUC2</i> | Df | Sum Sq | Mean Sq | F value | Pr(>F)  |    |
|-------------|----|--------|---------|---------|---------|----|
| Medium      | 2  | 332.64 | 166.322 | 26.238  | 0.00502 | ** |
| Individuals | 2  | 3.44   | 1.718   | 0.271   | 0.77558 |    |
| Residuals   | 4  | 25.36  | 6.339   |         |         |    |

## multiple comparisons - Medium

| <i>MUC2</i>            | diff       | lwr       | upr       | p adj     |
|------------------------|------------|-----------|-----------|-----------|
| p $\geq$ 10-i.c.i.     | -13.573963 | -20.90050 | -6.247423 | 0.0060086 |
| p $\leq$ 5-i.c.i.      | -12.090983 | -19.41752 | -4.764444 | 0.0091676 |
| p $\leq$ 5-p $\geq$ 10 | 1.482979   | -5.84356  | 8.809519  | 0.7650940 |

## multiple comparisons - Individuals

| <i>MUC2</i> | diff      | lwr       | upr      | p adj     |
|-------------|-----------|-----------|----------|-----------|
| #2-#1       | 1.2526722 | -6.073867 | 8.579212 | 0.8230733 |
| #3-#1       | 1.3618028 | -5.964737 | 8.688342 | 0.7960235 |
| #3-#2       | 0.1091306 | -7.217409 | 7.435670 | 0.9984481 |

**Table S3: Statistical analysis of jejunal tissue vs. jejunal organoids**

Two-way ANOVA, Tukey multiple comparisons of mean, 95 % family-wise confidence level; i.c.i., initial cell isolates;  $p \geq 10$ , organoids in passage higher or equal 10;  $p \leq 5$ , organoids in passage less or equal 5; code: 0 \*\*\* 0.001 \*\* 0.01 \* 0.05 . 0.1

| <b>LGR5</b>        | <b>Df</b> | <b>Sum Sq</b> | <b>Mean Sq</b> | <b>F value</b> | <b>Pr(&gt;F)</b> |
|--------------------|-----------|---------------|----------------|----------------|------------------|
| <b>Medium</b>      | 2         | 35.433        | 17.7163        | 2.1792         | 0.2290           |
| <b>Individuals</b> | 2         | 11.750        | 5.8751         | 0.7227         | 0.5396           |
| <b>Residuals</b>   | 4         | 32.518        | 8.1296         |                |                  |

**multiple comparisons - Medium**

| <b>LGR5</b>                                         | <b>diff</b> | <b>lwr</b> | <b>upr</b> | <b>p adj</b> |
|-----------------------------------------------------|-------------|------------|------------|--------------|
| <b><math>p \geq 10</math>-i.c.i.</b>                | 4.841921    | -3.455141  | 13.138983  | 0.2093951    |
| <b><math>p \leq 5</math>-i.c.i.</b>                 | 2.785817    | -5.511245  | 11.082879  | 0.5149856    |
| <b><math>p \leq 5</math>-<math>p \geq 10</math></b> | -2.056104   | -10.353166 | 6.240958   | 0.6778530    |

**multiple comparisons - Individuals**

| <b>LGR5</b>  | <b>diff</b> | <b>lwr</b> | <b>upr</b> | <b>p adj</b> |
|--------------|-------------|------------|------------|--------------|
| <b>#2-#1</b> | 1.311090    | -6.985972  | 9.608153   | 0.8457849    |
| <b>#3-#1</b> | -1.485920   | -9.782983  | 6.811142   | 0.8084512    |
| <b>#3-#2</b> | -2.797011   | -11.094073 | 5.500051   | 0.5126569    |

| <b>VIL1</b>        | <b>Df</b> | <b>Sum Sq</b> | <b>Mean Sq</b> | <b>F value</b> | <b>Pr(&gt;F)</b> |
|--------------------|-----------|---------------|----------------|----------------|------------------|
| <b>Medium</b>      | 2         | 15.8513       | 7.9257         | 14.5999        | 0.01452 *        |
| <b>Individuals</b> | 2         | 0.5618        | 0.2809         | 0.5174         | 0.63116          |
| <b>Residuals</b>   | 4         | 32.518        | 8.1296         |                |                  |

**multiple comparisons - Medium**

| <b>VIL1</b>                                         | <b>diff</b> | <b>lwr</b> | <b>upr</b> | <b>p adj</b> |
|-----------------------------------------------------|-------------|------------|------------|--------------|
| <b><math>p \geq 10</math>-i.c.i.</b>                | -2.901538   | -5.045581  | -0.757494  | 0.0184941    |
| <b><math>p \leq 5</math>-i.c.i.</b>                 | -2.720210   | -4.864254  | -0.576167  | 0.0230619    |
| <b><math>p \leq 5</math>-<math>p \geq 10</math></b> | 0.181327    | -1.962716  | 2.325371   | 0.9517448    |

**multiple comparisons - Individuals**

| <b>VIL1</b>  | <b>diff</b> | <b>lwr</b> | <b>upr</b> | <b>p adj</b> |
|--------------|-------------|------------|------------|--------------|
| <b>#2-#1</b> | 0.005176    | -2.138868  | 2.149220   | 0.9999592    |
| <b>#3-#1</b> | 0.532565    | -1.611479  | 2.676608   | 0.6767305    |
| <b>#3-#2</b> | 0.527389    | -1.616655  | 2.671432   | 0.6813906    |

**Table S3 (continued)**

| <b>CHGA</b>        | <b>Df</b> | <b>Sum Sq</b> | <b>Mean Sq</b> | <b>F value</b> | <b>Pr(&gt;F)</b> |    |
|--------------------|-----------|---------------|----------------|----------------|------------------|----|
| <b>Medium</b>      | 2         | 150.582       | 75.291         | 40.6131        | 0.00220          | ** |
| <b>Individuals</b> | 2         | 9.011         | 4.505          | 2.4303         | 0.20379          |    |
| <b>Residuals</b>   | 4         | 7.415         | 1.854          |                |                  |    |

**multiple comparisons - Medium**

| <b>CHGA</b>        | <b>diff</b> | <b>lwr</b> | <b>upr</b> | <b>p adj</b> |
|--------------------|-------------|------------|------------|--------------|
| <b>p≥10-i.c.i.</b> | -8.8779275  | -12.840066 | -4.915789  | 0.0029528    |
| <b>p≤5-i.c.i.</b>  | -8.4611420  | -12.423281 | -4.499003  | 0.0035397    |
| <b>p≤5-p≥10</b>    | 0.4167855   | -3.545353  | 4.378924   | 0.9268206    |

**multiple comparisons - Individuals**

| <b>CHGA</b>  | <b>diff</b> | <b>lwr</b> | <b>upr</b> | <b>p adj</b> |
|--------------|-------------|------------|------------|--------------|
| <b>#2-#1</b> | 2.4213708   | -1.540768  | 6.383510   | 0.1891011    |
| <b>#3-#1</b> | 0.8817167   | -3.080422  | 4.843856   | 0.7266449    |
| <b>#3-#2</b> | -1.5396541  | -5.501793  | 2.422485   | 0.4290366    |

| <b>MUC2</b>        | <b>Df</b> | <b>Sum Sq</b> | <b>Mean Sq</b> | <b>F value</b> | <b>Pr(&gt;F)</b> |   |
|--------------------|-----------|---------------|----------------|----------------|------------------|---|
| <b>Medium</b>      | 2         | 222.841       | 111.421        | 12.9272        | 0.01795          | * |
| <b>Individuals</b> | 2         | 60.170        | 30.085         | 3.4905         | 0.13269          |   |
| <b>Residuals</b>   | 4         | 34.476        | 8.619          |                |                  |   |

**multiple comparisons - Medium**

| <b>MUC2</b>        | <b>diff</b> | <b>lwr</b> | <b>upr</b> | <b>p adj</b> |
|--------------------|-------------|------------|------------|--------------|
| <b>p≥10-i.c.i.</b> | -10.4130909 | -18.956319 | -1.869863  | 0.0263949    |
| <b>p≤5-i.c.i.</b>  | -10.6925517 | -19.235780 | -2.149324  | 0.0241477    |
| <b>p≤5-p≥10</b>    | -0.2794608  | -8.822689  | 8.263767   | 0.9925488    |

**multiple comparisons - Individuals**

| <b>MUC2</b>  | <b>diff</b> | <b>lwr</b> | <b>upr</b> | <b>p adj</b> |
|--------------|-------------|------------|------------|--------------|
| <b>#2-#1</b> | 6.198464    | -2.344764  | 14.741692  | 0.1248425    |
| <b>#3-#1</b> | 1.972508    | -6.570720  | 10.515736  | 0.7105466    |
| <b>#3-#2</b> | -4.225956   | -12.769184 | 4.317272   | 0.2914304    |

**Table S4: Statistical analysis of colonic tissue vs. colonic organoids**

Two-way ANOVA, Tukey multiple comparisons of mean, 95 % family-wise confidence level; i.c.i., initial cell isolates;  $p \geq 10$ , organoids in passage higher or equal 10;  $p \leq 5$ , organoids in passage less or equal 5; code: 0 \*\*\* 0.001 \*\* 0.01 \* 0.05 . 0.1

| <b>LGR5</b>        | <b>Df</b> | <b>Sum Sq</b> | <b>Mean Sq</b> | <b>F value</b> | <b>Pr(&gt;F)</b> |
|--------------------|-----------|---------------|----------------|----------------|------------------|
| <b>Medium</b>      | 2         | 25.3744       | 12.6872        | 3.2763         | 0.1437           |
| <b>Individuals</b> | 2         | 9.6454        | 4.8227         | 1.2454         | 0.3798           |
| <b>Residuals</b>   | 4         | 15.4897       | 3.8724         |                |                  |

**multiple comparisons - Medium**

| <b>LGR5</b>                                         | <b>diff</b> | <b>lwr</b> | <b>upr</b> | <b>p adj</b> |
|-----------------------------------------------------|-------------|------------|------------|--------------|
| <b><math>p \geq 10</math>-i.c.i.</b>                | -2.873601   | -8.600003  | 2.852801   | 0.2837841    |
| <b><math>p \leq 5</math>-i.c.i.</b>                 | -3.985140   | -9.711542  | 1.741262   | 0.1387964    |
| <b><math>p \leq 5</math>-<math>p \geq 10</math></b> | -1.111539   | -6.837941  | 4.614863   | 0.7807217    |

**multiple comparisons - Individuals**

| <b>LGR5</b>  | <b>diff</b> | <b>lwr</b> | <b>upr</b> | <b>p adj</b> |
|--------------|-------------|------------|------------|--------------|
| <b>#2-#1</b> | 1.9765268   | -3.749875  | 7.702929   | 0.4988967    |
| <b>#3-#1</b> | 2.3640237   | -3.362378  | 8.090426   | 0.3934388    |
| <b>#3-#2</b> | 0.3874969   | -5.338905  | 6.113899   | 0.9686938    |

| <b>VIL1</b>        | <b>Df</b> | <b>Sum Sq</b> | <b>Mean Sq</b> | <b>F value</b> | <b>Pr(&gt;F)</b> |
|--------------------|-----------|---------------|----------------|----------------|------------------|
| <b>Medium</b>      | 2         | 16.0401       | 8.0201         | 7.2596         | 0.04665 *        |
| <b>Individuals</b> | 2         | 2.8117        | 1.4058         | 1.2725         | 0.37350          |
| <b>Residuals</b>   | 4         | 4.4190        | 1.1047         |                |                  |

**multiple comparisons - Medium**

| <b>VIL1</b>                                         | <b>diff</b> | <b>lwr</b> | <b>upr</b> | <b>p adj</b> |
|-----------------------------------------------------|-------------|------------|------------|--------------|
| <b><math>p \geq 10</math>-i.c.i.</b>                | -2.767718   | -5.826313  | 0.290878   | 0.0676692    |
| <b><math>p \leq 5</math>-i.c.i.</b>                 | -2.892125   | -5.950721  | 0.166471   | 0.0593407    |
| <b><math>p \leq 5</math>-<math>p \geq 10</math></b> | -0.124408   | -3.183004  | 2.934188   | 0.9885146    |

**multiple comparisons - Individuals**

| <b>VIL1</b>  | <b>diff</b> | <b>lwr</b> | <b>upr</b> | <b>p adj</b> |
|--------------|-------------|------------|------------|--------------|
| <b>#2-#1</b> | 0.8519800   | -2.206616  | 3.910576   | 0.6189954    |
| <b>#3-#1</b> | -0.5021408  | -3.560737  | 2.556455   | 0.8351045    |
| <b>#3-#2</b> | -1.3541208  | -4.412717  | 1.704475   | 0.3529565    |

**Table S4 (continued)**

| <b>CHGA</b>        | <b>Df</b> | <b>Sum Sq</b> | <b>Mean Sq</b> | <b>F value</b> | <b>Pr(&gt;F)</b> |
|--------------------|-----------|---------------|----------------|----------------|------------------|
| <b>Medium</b>      | 2         | 198.334       | 99.167         | 44.6617        | 0.00184 **       |
| <b>Individuals</b> | 2         | 11.148        | 5.574          | 2.5103         | 0.19663          |
| <b>Residuals</b>   | 4         | 8.882         | 2.220          |                |                  |

**multiple comparisons - Medium**

| <b>CHGA</b>        | <b>diff</b> | <b>lwr</b> | <b>upr</b> | <b>p adj</b> |
|--------------------|-------------|------------|------------|--------------|
| <b>p≥10-i.c.i.</b> | -8.899055   | -13.23523  | -4.562882  | 0.0041088    |
| <b>p≤5-i.c.i.</b>  | -10.756042  | -15.09221  | -6.419869  | 0.0020062    |
| <b>p≤5-p≥10</b>    | -1.856987   | -6.19316   | 2.479186   | 0.3720792    |

**multiple comparisons - Individuals**

| <b>CHGA</b>  | <b>diff</b> | <b>lwr</b> | <b>upr</b> | <b>p adj</b> |
|--------------|-------------|------------|------------|--------------|
| <b>#2-#1</b> | 1.842330    | -2.493843  | 6.178502   | 0.3766735    |
| <b>#3-#1</b> | -0.819035   | -5.155208  | 3.517138   | 0.7904525    |
| <b>#3-#2</b> | -2.661364   | -6.997537  | 1.674808   | 0.1872744    |

| <b>MUC2</b>        | <b>Df</b> | <b>Sum Sq</b> | <b>Mean Sq</b> | <b>F value</b> | <b>Pr(&gt;F)</b> |
|--------------------|-----------|---------------|----------------|----------------|------------------|
| <b>Medium</b>      | 2         | 379.57        | 189.786        | 73.2049        | 0.00071 ***      |
| <b>Individuals</b> | 2         | 49.15         | 24.577         | 9.4799         | 0.03035 *        |
| <b>Residuals</b>   | 4         | 10.37         | 2.593          |                |                  |

**multiple comparisons - Medium**

| <b>MUC2</b>        | <b>diff</b> | <b>lwr</b> | <b>upr</b> | <b>p adj</b> |
|--------------------|-------------|------------|------------|--------------|
| <b>p≥10-i.c.i.</b> | -13.5861904 | -18.271661 | -8.900720  | 0.0011010    |
| <b>p≤5-i.c.i.</b>  | -13.9588393 | -18.644309 | -9.273369  | 0.0009916    |
| <b>p≤5-p≥10</b>    | -0.3726488  | -5.058119  | 4.312821   | 0.9571425    |

**multiple comparisons - Individuals**

| <b>MUC2</b>  | <b>diff</b> | <b>lwr</b> | <b>upr</b> | <b>p adj</b> |
|--------------|-------------|------------|------------|--------------|
| <b>#2-#1</b> | 5.2510127   | 0.5655425  | 9.936483   | 0.0348169    |
| <b>#3-#1</b> | 0.6513824   | -4.0340877 | 5.336853   | 0.8773299    |
| <b>#3-#2</b> | -4.5996302  | -9.2851004 | 0.085840   | 0.0529372    |

**Table S5: Statistical analysis of duodenal organoids in different media**

Two-way ANOVA, Tukey multiple comparisons of mean, 95 % family-wise confidence level; i.c.i., initial cell isolates; Exp., expansion medium; Diff., differentiation medium; Ref., refined medium; code: 0 \*\*\* 0.001 \*\* 0.01 \* 0.05 . 0.1

| <b>LGR5</b>        | <b>Df</b> | <b>Sum Sq</b> | <b>Mean Sq</b> | <b>F value</b> | <b>Pr(&gt;F)</b> |
|--------------------|-----------|---------------|----------------|----------------|------------------|
| <b>Medium</b>      | 3         | 46.631        | 15.5436        | 5.5390         | 0.03653 *        |
| <b>Individuals</b> | 2         | 15.264        | 7.6319         | 2.7196         | 0.14430          |
| <b>Residuals</b>   | 6         | 16.837        | 2.8062         |                |                  |

**multiple comparisons - Medium**

| <b>LGR5</b>         | <b>diff</b> | <b>lwr</b> | <b>upr</b> | <b>p adj</b> |
|---------------------|-------------|------------|------------|--------------|
| <b>Diff.-i.c.i.</b> | 2.2729562 - | 2.4618836  | 7.007796   | 0.4159926    |
| <b>Exp.-i.c.i.</b>  | 4.3424884 - | 0.3923513  | 9.077328   | 0.0698991    |
| <b>Ref.-i.c.i.</b>  | 5.0589521   | 0.3241124  | 9.793792   | 0.0381549    |
| <b>Exp.-Diff.</b>   | 2.0695323 - | 2.6653075  | 6.804372   | 0.4854950    |
| <b>Ref.-Diff.</b>   | 2.7859960 - | 1.9488438  | 7.520836   | 0.2730038    |
| <b>Ref.-Exp.</b>    | 0.7164637 - | 4.0183761  | 5.451303   | 0.9502100    |

**multiple comparisons - Individuals**

| <b>LGR5</b>  | <b>diff</b> | <b>lwr</b> | <b>upr</b> | <b>p adj</b> |
|--------------|-------------|------------|------------|--------------|
| <b>#2-#1</b> | 1.446813    | -2.1876418 | 5.081268   | 0.4844163    |
| <b>#3-#1</b> | 2.761534    | -0.8729209 | 6.395989   | 0.1265886    |
| <b>#3-#2</b> | 1.314721    | -2.3197339 | 4.949176   | 0.5429705    |

| <b>NEUROG3</b>     | <b>Df</b> | <b>Sum Sq</b> | <b>Mean Sq</b> | <b>F value</b> | <b>Pr(&gt;F)</b> |
|--------------------|-----------|---------------|----------------|----------------|------------------|
| <b>Medium</b>      | 3         | 86.881        | 28.960         | 4.4266         | 0.05768 .        |
| <b>Individuals</b> | 2         | 186.133       | 93.067         | 14.2254        | 0.00528 **       |
| <b>Residuals</b>   | 6         | 39.254        | 6.542          |                |                  |

**multiple comparisons - Medium**

| <b>NEUROG3</b>      | <b>diff</b> | <b>lwr</b> | <b>upr</b> | <b>p adj</b> |
|---------------------|-------------|------------|------------|--------------|
| <b>Diff.-i.c.i.</b> | -3.6017701  | -10.831300 | 3.6277601  | 0.3887233    |
| <b>Exp.-i.c.i.</b>  | -7.6066291  | -14.836159 | -0.377099  | 0.0406678    |
| <b>Ref.-i.c.i.</b>  | -3.7967634  | -11.026294 | 3.4327668  | 0.3506542    |
| <b>Exp.-Diff.</b>   | -4.0048589  | -11.234389 | 3.2246713  | 0.3133035    |
| <b>Ref.-Diff.</b>   | -0.1949933  | -7.424524  | 7.0345369  | 0.9996744    |
| <b>Ref.-Exp.</b>    | 3.8098656   | -3.419665  | 11.039396  | 0.3482026    |

**multiple comparisons - Individuals**

| <b>NEUROG3</b> | <b>diff</b> | <b>lwr</b> | <b>upr</b> | <b>p adj</b> |
|----------------|-------------|------------|------------|--------------|
| <b>#2-#1</b>   | 2.276278    | -3.273096  | 7.825653   | 0.4657066    |
| <b>#3-#1</b>   | 9.256877    | 3.707502   | 14.806252  | 0.0052379    |
| <b>#3-#2</b>   | 6.980598    | 1.431224   | 12.529973  | 0.0195958    |



Table S5 (continued)

| <b>CHGA</b> | <b>Df</b> | <b>Sum Sq</b> | <b>Mean Sq</b> | <b>F value</b> | <b>Pr(&gt;F)</b> |
|-------------|-----------|---------------|----------------|----------------|------------------|
| Medium      | 3         | 180.728       | 60.243         | 5.6176         | 0.03546 *        |
| Individuals | 2         | 75.413        | 37.707         | 3.5161         | 0.09759 .        |
| Residuals   | 6         | 64.344        | 10.724         |                |                  |

## multiple comparisons - Medium

| <b>CHGA</b>  | <b>diff</b> | <b>lwr</b> | <b>upr</b> | <b>p adj</b> |
|--------------|-------------|------------|------------|--------------|
| Diff.-i.c.i. | -9.1954013  | -18.451385 | 0.0605824  | 0.0513257    |
| Exp.-i.c.i.  | -9.6721841  | -18.928168 | -0.4162005 | 0.0418345    |
| Ref.-i.c.i.  | -7.3206562  | -16.576640 | 1.9353275  | 0.1178789    |
| Exp.-Diff.   | -0.4767829  | -9.732767  | 8.7792008  | 0.9977609    |
| Ref.-Diff.   | 1.8747451   | -7.381239  | 11.130729  | 0.8930940    |
| Ref.-Exp.    | 2.3515279   | -6.904456  | 11.607512  | 0.8156819    |

## multiple comparisons - Individuals

| <b>CHGA</b> | <b>diff</b> | <b>lwr</b> | <b>upr</b> | <b>p adj</b> |
|-------------|-------------|------------|------------|--------------|
| #2-#1       | 1.820086    | -5.284791  | 8.924963   | 0.7245827    |
| #3-#1       | 5.988966    | -1.115911  | 13.093843  | 0.0914564    |
| #3-#2       | 4.168880    | -2.935997  | 11.273757  | 0.2476559    |

| <b>MUC2</b> | <b>Df</b> | <b>Sum Sq</b> | <b>Mean Sq</b> | <b>F value</b> | <b>Pr(&gt;F)</b> |
|-------------|-----------|---------------|----------------|----------------|------------------|
| Medium      | 3         | 305.97        | 101.990        | 5.7577         | 0.03365 *        |
| Individuals | 2         | 103.46        | 51.732         | 2.9204         | 0.13011          |
| Residuals   | 6         | 106.28        | 17.714         |                |                  |

## multiple comparisons - Medium

| <b>MUC2</b>  | <b>diff</b> | <b>lwr</b> | <b>upr</b> | <b>p adj</b> |
|--------------|-------------|------------|------------|--------------|
| Diff.-i.c.i. | -10.550415  | -22.446420 | 1.34559    | 0.0791361    |
| Exp.-i.c.i.  | -13.573963  | -25.469968 | -1.67795   | 0.0288448    |
| Ref.-i.c.i.  | -8.791213   | -20.687218 | 3.10479    | 0.1464620    |
| Exp.-Diff.   | -3.023548   | -14.919553 | 8.87245    | 0.8154995    |
| Ref.-Diff.   | 1.759202    | -10.136803 | 13.65520   | 0.9532240    |
| Ref.-Exp.    | 4.782750    | -7.113255  | 16.67875   | 0.5466663    |

## multiple comparisons - Individuals

| <b>MUC2</b> | <b>diff</b> | <b>lwr</b> | <b>upr</b> | <b>p adj</b> |
|-------------|-------------|------------|------------|--------------|
| #2-#1       | 1.293926    | -7.837427  | 10.42528   | 0.9026701    |
| #3-#1       | 6.774234    | -2.357119  | 15.90559   | 0.1358137    |
| #3-#2       | 5.480308    | -3.651045  | 14.61166   | 0.2353544    |

**Table S5 (continued)**

| <b>ASCL2</b>       | <b>Df</b> | <b>Sum Sq</b> | <b>Mean Sq</b> | <b>F value</b> | <b>Pr(&gt;F)</b> |
|--------------------|-----------|---------------|----------------|----------------|------------------|
| <b>Medium</b>      | 3         | 4.490         | 1.4966         | 0.9419         | 0.47710          |
| <b>Individuals</b> | 2         | 34.823        | 17.4115        | 10.9584        | 0.00993 **       |
| <b>Residuals</b>   | 6         | 9.533         | 1.5889         |                |                  |

**multiple comparisons - Medium**

| <b>ASCL2</b>        | <b>diff</b> | <b>lwr</b> | <b>upr</b> | <b>p adj</b> |
|---------------------|-------------|------------|------------|--------------|
| <b>Diff.-i.c.i.</b> | -0.51337033 | -4.076165  | 3.049424   | 0.9564261    |
| <b>Exp.-i.c.i.</b>  | -0.60777646 | -4.170571  | 2.955018   | 0.9313562    |
| <b>Ref.-i.c.i.</b>  | 0.93403075  | -2.628764  | 4.496825   | 0.8020943    |
| <b>Exp.-Diff.</b>   | -0.09440612 | -3.657201  | 3.468388   | 0.9996912    |
| <b>Ref.-Diff.</b>   | 1.44740108  | -2.115393  | 5.010196   | 0.5391423    |
| <b>Ref.-Exp.</b>    | 1.54180720  | -2.020987  | 5.104602   | 0.4928633    |

**multiple comparisons - Individuals**

| <b>ASCL2</b> | <b>diff</b> | <b>lwr</b>  | <b>upr</b> | <b>p adj</b> |
|--------------|-------------|-------------|------------|--------------|
| <b>#2-#1</b> | 1.343194    | -1.39160066 | 4.077989   | 0.3525672    |
| <b>#3-#1</b> | 4.092928    | 1.35813351  | 6.827723   | 0.0088649    |
| <b>#3-#2</b> | 2.749734    | 0.01493934  | 5.484529   | 0.0489795    |

| <b>EPHB2</b>       | <b>Df</b> | <b>Sum Sq</b> | <b>Mean Sq</b> | <b>F value</b> | <b>Pr(&gt;F)</b> |
|--------------------|-----------|---------------|----------------|----------------|------------------|
| <b>Medium</b>      | 3         | 9.2193        | 3.0731         | 2.0870         | 0.2034           |
| <b>Individuals</b> | 2         | 8.6206        | 4.3103         | 2.9272         | 0.1297           |
| <b>Residuals</b>   | 6         | 8.8350        | 1.4725         |                |                  |

**multiple comparisons - Medium**

| <b>EPHB2</b>        | <b>diff</b> | <b>lwr</b> | <b>upr</b> | <b>p adj</b> |
|---------------------|-------------|------------|------------|--------------|
| <b>Diff.-i.c.i.</b> | 1.9359050   | -1.493918  | 5.365728   | 0.3005477    |
| <b>Exp.-i.c.i.</b>  | 1.5235298   | -1.906294  | 4.953353   | 0.4735326    |
| <b>Ref.-i.c.i.</b>  | 2.3040691   | -1.125754  | 5.733892   | 0.1938990    |
| <b>Exp.-Diff.</b>   | -0.4123753  | -3.842199  | 3.017448   | 0.9736473    |
| <b>Ref.-Diff.</b>   | 0.3681640   | -3.061659  | 3.797987   | 0.9808879    |
| <b>Ref.-Exp.</b>    | 0.7805393   | -2.649284  | 4.210363   | 0.8576115    |

**multiple comparisons - Individuals**

| <b>EPHB2</b> | <b>diff</b> | <b>lwr</b> | <b>upr</b> | <b>p adj</b> |
|--------------|-------------|------------|------------|--------------|
| <b>#2-#1</b> | 0.8831013   | -1.7496252 | 3.515828   | 0.5871956    |
| <b>#3-#1</b> | 2.0687593   | -0.5639671 | 4.701486   | 0.1143458    |
| <b>#3-#2</b> | 1.1856580   | -1.4470684 | 3.818384   | 0.4068548    |

Table S5 (continued)

| <i>BMI1</i> | Df | Sum Sq | Mean Sq | F value | Pr(>F) |
|-------------|----|--------|---------|---------|--------|
| Medium      | 3  | 3.6514 | 1.21715 | 2.1033  | 0.2012 |
| Individuals | 2  | 3.1345 | 1.56723 | 2.7082  | 0.1452 |
| Residuals   | 6  | 3.4721 | 0.57869 |         |        |

## multiple comparisons - Medium

| <i>BMI1</i>  | diff        | lwr       | upr       | p adj     |
|--------------|-------------|-----------|-----------|-----------|
| Diff.-i.c.i. | -1.28911307 | -3.439260 | 0.8610340 | 0.2609643 |
| Exp.-i.c.i.  | -1.36785865 | -3.518006 | 0.7822884 | 0.2246685 |
| Ref.-i.c.i.  | -1.10915260 | -3.259300 | 1.0409944 | 0.3634805 |
| Exp.-Diff.   | -0.07874558 | -2.228893 | 2.0714015 | 0.9991882 |
| Ref.-Diff.   | 0.17996047  | -1.970187 | 2.3301075 | 0.9906683 |
| Ref.-Exp.    | 0.25870605  | -1.891441 | 2.4088531 | 0.9735930 |

## multiple comparisons - Individuals

| <i>BMI1</i> | diff      | lwr        | upr      | p adj     |
|-------------|-----------|------------|----------|-----------|
| #2-#1       | 0.8203268 | -0.8301223 | 2.470776 | 0.3452119 |
| #3-#1       | 1.2291397 | -0.4213094 | 2.879589 | 0.1342980 |
| #3-#2       | 0.4088129 | -1.2416362 | 2.059262 | 0.7391612 |

| <i>NOTCH1</i> | Df | Sum Sq  | Mean Sq | F value | Pr(>F) |
|---------------|----|---------|---------|---------|--------|
| Medium        | 3  | 1.2729  | 0.4243  | 0.1085  | 0.9520 |
| Individuals   | 2  | 16.0782 | 8.0391  | 2.0565  | 0.2088 |
| Residuals     | 6  | 23.4544 | 3.9091  |         |        |

## multiple comparisons - Medium

| <i>NOTCH1</i> | diff        | lwr       | upr      | p adj     |
|---------------|-------------|-----------|----------|-----------|
| Diff.-i.c.i.  | -0.26720075 | -5.855523 | 5.321121 | 0.9982048 |
| Exp.-i.c.i.   | -0.82850535 | -6.416827 | 4.759816 | 0.9529003 |
| Ref.-i.c.i.   | -0.06704766 | -5.655370 | 5.521274 | 0.9999712 |
| Exp.-Diff.    | -0.56130460 | -6.149626 | 5.027017 | 0.9841946 |
| Ref.-Diff.    | 0.20015309  | -5.388169 | 5.788475 | 0.9992404 |
| Ref.-Exp.     | 0.76145769  | -4.826864 | 6.349780 | 0.9626372 |

## multiple comparisons - Individuals

| <i>NOTCH1</i> | diff      | lwr       | upr      | p adj     |
|---------------|-----------|-----------|----------|-----------|
| #2-#1         | 1.8960873 | -2.393499 | 6.185673 | 0.4186361 |
| #3-#1         | 2.7736834 | -1.515903 | 7.063270 | 0.1968933 |
| #3-#2         | 0.8775961 | -3.411990 | 5.167182 | 0.8109613 |

Table S5 (continued)

| <i>PROM1</i> | Df | Sum Sq | Mean Sq | F value | Pr(>F) |
|--------------|----|--------|---------|---------|--------|
| Medium       | 3  | 1.356  | 0.4520  | 0.2551  | 0.8552 |
| Individuals  | 2  | 9.240  | 4.6200  | 2.6078  | 0.1531 |
| Residuals    | 6  | 10.630 | 1.7716  |         |        |

## multiple comparisons - Medium

| <i>PROM1</i> | diff        | lwr       | upr      | p adj     |
|--------------|-------------|-----------|----------|-----------|
| Diff.-i.c.i. | 0.22296423  | -3.539163 | 3.985092 | 0.9966093 |
| Exp.-i.c.i.  | -0.61009966 | -4.372227 | 3.152028 | 0.9399984 |
| Ref.-i.c.i.  | 0.19762875  | -3.564499 | 3.959756 | 0.9976269 |
| Exp.-Diff.   | -0.83306388 | -4.595191 | 2.929064 | 0.8667215 |
| Ref.-Diff.   | -0.02533548 | -3.787463 | 3.736792 | 0.9999949 |
| Ref.-Exp.    | 0.80772841  | -2.954399 | 4.569856 | 0.8764183 |

## multiple comparisons - Individuals

| <i>PROM1</i> | diff       | lwr        | upr      | p adj     |
|--------------|------------|------------|----------|-----------|
| #2-#1        | 1.9710925  | -0.9167099 | 4.858895 | 0.1712435 |
| #3-#1        | 1.7279119  | -1.1598905 | 4.615714 | 0.2369883 |
| #3-#2        | -0.2431806 | -3.1309831 | 2.644622 | 0.9640852 |

| <i>VIL1</i> | Df | Sum Sq | Mean Sq | F value | Pr(>F)      |
|-------------|----|--------|---------|---------|-------------|
| Medium      | 3  | 57.900 | 19.300  | 56.003  | 0.00009 *** |
| Individuals | 2  | 4.927  | 2.464   | 7.149   | 0.02583 *   |
| Residuals   | 6  | 2.068  | 0.345   |         |             |

## multiple comparisons - Medium

| <i>VIL1</i>  | diff       | lwr       | upr       | p adj     |
|--------------|------------|-----------|-----------|-----------|
| Diff.-i.c.i. | -4.9208167 | -6.580102 | -3.261531 | 0.0002088 |
| Exp.-i.c.i.  | -4.9670027 | -6.626288 | -3.307717 | 0.0001980 |
| Ref.-i.c.i.  | -5.2973492 | -6.956635 | -3.638064 | 0.0001372 |
| Exp.-Diff.   | -0.0461861 | -1.705471 | 1.613099  | 0.9996422 |
| Ref.-Diff.   | -0.3765325 | -2.035818 | 1.282753  | 0.8585872 |
| Ref.-Exp.    | -0.3303465 | -1.989632 | 1.328939  | 0.8976296 |

## multiple comparisons - Individuals

| <i>VIL1</i> | diff      | lwr        | upr      | p adj     |
|-------------|-----------|------------|----------|-----------|
| #2-#1       | -0.239679 | -1.5133435 | 1.033986 | 0.8367428 |
| #3-#1       | 1.223558  | -0.0501067 | 2.497222 | 0.0580547 |
| #3-#2       | 1.463237  | 0.1895722  | 2.736901 | 0.0288403 |

**Table S6: Statistical analysis of jejunal organoids in different media**

Two-way ANOVA, Tukey multiple comparisons of mean, 95 % family-wise confidence level; i.c.i., initial cell isolates; Exp., expansion medium; Diff., differentiation medium; Ref., refined medium; code: 0 \*\*\* 0.001 \*\* 0.01 \* 0.05 . 0.1

| <b>LGR5</b>        | <b>Df</b> | <b>Sum Sq</b> | <b>Mean Sq</b> | <b>F value</b> | <b>Pr(&gt;F)</b> |
|--------------------|-----------|---------------|----------------|----------------|------------------|
| <b>Medium</b>      | 3         | 36.155        | 12.0516        | 2.7531         | 0.13460          |
| <b>Individuals</b> | 2         | 40.609        | 20.3044        | 4.6384         | 0.06058          |
| <b>Residuals</b>   | 6         | 26.265        | 4.3775         |                |                  |

**multiple comparisons - Medium**

| <b>LGR5</b>         | <b>diff</b> | <b>lwr</b> | <b>upr</b> | <b>p adj</b> |
|---------------------|-------------|------------|------------|--------------|
| <b>Diff.-i.c.i.</b> | 3.1165489   | -2.797123  | 9.030221   | 0.3481746    |
| <b>Exp.-i.c.i.</b>  | 4.8419211   | -1.071751  | 10.755593  | 0.1049447    |
| <b>Ref.-i.c.i.</b>  | 2.5566058   | -3.357066  | 8.470278   | 0.4935994    |
| <b>Exp.-Diff.</b>   | 1.7253721   | -4.188300  | 7.639044   | 0.7502072    |
| <b>Ref.-Diff.</b>   | -0.5599432  | -6.473615  | 5.353729   | 0.9866617    |
| <b>Ref.-Exp.</b>    | -2.2853153  | -8.198987  | 3.628357   | 0.5749125    |

**multiple comparisons - Individuals**

| <b>LGR5</b>  | <b>diff</b> | <b>lwr</b> | <b>upr</b> | <b>p adj</b> |
|--------------|-------------|------------|------------|--------------|
| <b>#2-#1</b> | 0.4167766   | -4.122548  | 4.9561009  | 0.9575005    |
| <b>#3-#1</b> | -3.6772251  | -8.216549  | 0.8620992  | 0.1039745    |
| <b>#3-#2</b> | -4.0940017  | -8.633326  | 0.4453226  | 0.0727493    |

| <b>NEUROG3</b>     | <b>Df</b> | <b>Sum Sq</b> | <b>Mean Sq</b> | <b>F value</b> | <b>Pr(&gt;F)</b> |
|--------------------|-----------|---------------|----------------|----------------|------------------|
| <b>Medium</b>      | 3         | 68.665        | 22.8882        | 28.5235        | 0.0006 ***       |
| <b>Individuals</b> | 2         | 0.473         | 0.2363         | 0.2944         | 0.7551           |
| <b>Residuals</b>   | 6         | 4.815         | 0.8024         |                |                  |

**multiple comparisons - Medium**

| <b>NEUROG3</b>      | <b>diff</b> | <b>lwr</b> | <b>upr</b> | <b>p adj</b> |
|---------------------|-------------|------------|------------|--------------|
| <b>Diff.-i.c.i.</b> | 1.274379    | -1.2575401 | 3.806298   | 0.3812656    |
| <b>Exp.-i.c.i.</b>  | -3.671666   | -6.2035854 | -1.139747  | 0.0095567    |
| <b>Ref.-i.c.i.</b>  | 2.796962    | 0.2650425  | 5.328881   | 0.0331531    |
| <b>Exp.-Diff.</b>   | -4.946045   | -7.4779645 | -2.414126  | 0.0020905    |
| <b>Ref.-Diff.</b>   | 1.522583    | -1.0093366 | 4.054502   | 0.2590550    |
| <b>Ref.-Exp.</b>    | 6.468628    | 3.9367088  | 9.000547   | 0.0004834    |

**multiple comparisons - Individuals**

| <b>NEUROG3</b> | <b>diff</b> | <b>lwr</b> | <b>upr</b> | <b>p adj</b> |
|----------------|-------------|------------|------------|--------------|
| <b>#2-#1</b>   | 0.136271    | -1.807226  | 2.079768   | 0.9749137    |
| <b>#3-#1</b>   | 0.472199    | -1.471298  | 2.415696   | 0.7472559    |
| <b>#3-#2</b>   | 0.335928    | -1.607569  | 2.279425   | 0.8597760    |

Table S6 (continued)

| <i>CHGA</i> | Df | Sum Sq  | Mean Sq | F value | Pr(>F)     |
|-------------|----|---------|---------|---------|------------|
| Medium      | 3  | 138.637 | 46.212  | 21.7246 | 0.00127 ** |
| Individuals | 2  | 20.991  | 10.495  | 4.9339  | 0.05406 .  |
| Residuals   | 6  | 12.763  | 2.127   |         |            |

## multiple comparisons - Medium

| <i>CHGA</i>  | diff      | lwr         | upr       | p adj     |
|--------------|-----------|-------------|-----------|-----------|
| Diff.-i.c.i. | -6.655476 | -10.7778636 | -2.533088 | 0.0056164 |
| Exp.-i.c.i.  | -8.877927 | -13.0003151 | -4.755540 | 0.0012382 |
| Ref.-i.c.i.  | -3.008825 | -7.1312128  | 1.113562  | 0.1521652 |
| Exp.-Diff.   | -2.222451 | -6.3448391  | 1.899936  | 0.3321387 |
| Ref.-Diff.   | 3.646651  | -0.4757368  | 7.769038  | 0.0798861 |
| Ref.-Exp.    | 5.869102  | 1.7467147   | 9.991490  | 0.0104465 |

## multiple comparisons - Individuals

| <i>CHGA</i> | diff       | lwr        | upr      | p adj     |
|-------------|------------|------------|----------|-----------|
| #2-#1       | 3.0287061  | -0.1356314 | 6.193044 | 0.0588404 |
| #3-#1       | 0.5185096  | -2.6458279 | 3.682847 | 0.8727269 |
| #3-#2       | -2.5101965 | -5.6745340 | 0.654141 | 0.1110407 |

| <i>MUC2</i> | Df | Sum Sq  | Mean Sq | F value | Pr(>F)     |
|-------------|----|---------|---------|---------|------------|
| Medium      | 3  | 184.246 | 61.415  | 13.9443 | 0.00411 ** |
| Individuals | 2  | 8.035   | 4.018   | 0.9122  | 0.45092    |
| Residuals   | 6  | 26.426  | 4.404   |         |            |

## multiple comparisons - Medium

| <i>MUC2</i>  | diff       | lwr        | upr        | p adj     |
|--------------|------------|------------|------------|-----------|
| Diff.-i.c.i. | -4.870446  | -10.802236 | 1.0613433  | 0.1039407 |
| Exp.-i.c.i.  | -10.413091 | -16.344880 | -4.4813015 | 0.0036616 |
| Ref.-i.c.i.  | -2.012563  | -7.944353  | 3.9192263  | 0.6624502 |
| Exp.-Diff.   | -5.542645  | -11.474434 | 0.3891446  | 0.0651459 |
| Ref.-Diff.   | 2.857883   | -3.073906  | 8.7896724  | 0.4133198 |
| Ref.-Exp.    | 8.400528   | 2.468738   | 14.3323172 | 0.0107167 |

## multiple comparisons - Individuals

| <i>MUC2</i> | diff       | lwr       | upr      | p adj     |
|-------------|------------|-----------|----------|-----------|
| #2-#1       | 1.9815210  | -2.571710 | 6.534752 | 0.4284646 |
| #3-#1       | 1.2523907  | -3.300840 | 5.805622 | 0.6918295 |
| #3-#2       | -0.7291303 | -5.282361 | 3.824101 | 0.8779664 |

Table S6 (continued)

| <b>ASCL2</b> | <b>Df</b> | <b>Sum Sq</b> | <b>Mean Sq</b> | <b>F value</b> | <b>Pr(&gt;F)</b> |
|--------------|-----------|---------------|----------------|----------------|------------------|
| Medium       | 3         | 8.4816        | 2.8272         | 1.5257         | 0.3014           |
| Individuals  | 2         | 2.9731        | 1.4865         | 0.8022         | 0.4912           |
| Residuals    | 6         | 11.1187       | 1.8531         |                |                  |

## multiple comparisons - Medium

| <b>ASCL2</b> | <b>diff</b> | <b>lwr</b> | <b>upr</b> | <b>p adj</b> |
|--------------|-------------|------------|------------|--------------|
| Diff.-i.c.i. | 2.2007884   | -1.646863  | 6.048440   | 0.2916274    |
| Exp.-i.c.i.  | 1.8200768   | -2.027575  | 5.667728   | 0.4268733    |
| Ref.-i.c.i.  | 1.6235295   | -2.224122  | 5.471181   | 0.5114791    |
| Exp.-Diff.   | -0.3807116  | -4.228363  | 3.466940   | 0.9848609    |
| Ref.-Diff.   | -0.5772589  | -4.424910  | 3.270393   | 0.9513527    |
| Ref.-Exp.    | -0.1965473  | -4.044199  | 3.651104   | 0.9978157    |

## multiple comparisons - Individuals

| <b>ASCL2</b> | <b>diff</b> | <b>lwr</b> | <b>upr</b> | <b>p adj</b> |
|--------------|-------------|------------|------------|--------------|
| #2-#1        | -1.1103136  | -4.063764  | 1.843137   | 0.5196990    |
| #3-#1        | -0.9913935  | -3.944844  | 1.962057   | 0.5867853    |
| #3-#2        | 0.1189201   | -2.834531  | 3.072371   | 0.9916324    |

| <b>EPHB2</b> | <b>Df</b> | <b>Sum Sq</b> | <b>Mean Sq</b> | <b>F value</b> | <b>Pr(&gt;F)</b> |
|--------------|-----------|---------------|----------------|----------------|------------------|
| Medium       | 3         | 8.6974        | 2.8991         | 1.3829         | 0.3356           |
| Individuals  | 2         | 12.5919       | 6.2959         | 3.0032         | 0.1248           |
| Residuals    | 6         | 12.5786       | 2.0964         |                |                  |

## multiple comparisons - Medium

| <b>EPHB2</b> | <b>diff</b> | <b>lwr</b> | <b>upr</b> | <b>p adj</b> |
|--------------|-------------|------------|------------|--------------|
| Diff.-i.c.i. | 1.6606551   | -2.431824  | 5.753134   | 0.5399845    |
| Exp.-i.c.i.  | 2.2599590   | -1.832520  | 6.352438   | 0.3154603    |
| Ref.-i.c.i.  | 1.7654026   | -2.327076  | 5.857881   | 0.4952134    |
| Exp.-Diff.   | 0.5993038   | -3.493175  | 4.691783   | 0.9544571    |
| Ref.-Diff.   | 0.1047474   | -3.987731  | 4.197226   | 0.9997216    |
| Ref.-Exp.    | -0.4945564  | -4.587035  | 3.597922   | 0.9732676    |

## multiple comparisons - Individuals

| <b>EPHB2</b> | <b>diff</b> | <b>lwr</b> | <b>upr</b> | <b>p adj</b> |
|--------------|-------------|------------|------------|--------------|
| #2-#1        | 0.6818513   | -2.459528  | 3.8232307  | 0.7907144    |
| #3-#1        | -1.7503088  | -4.891688  | 1.3910707  | 0.2768419    |
| #3-#2        | -2.4321600  | -5.573540  | 0.7092195  | 0.1196388    |

Table S6 (continued)

| <i>BMI1</i> | Df | Sum Sq  | Mean Sq | F value | Pr(>F) |
|-------------|----|---------|---------|---------|--------|
| Medium      | 3  | 1.52044 | 0.50681 | 1.4246  | 0.3251 |
| Individuals | 2  | 0.66817 | 0.33408 | 0.9391  | 0.4418 |
| Residuals   | 6  | 2.13452 | 0.35575 |         |        |

## multiple comparisons - Medium

| <i>BMI1</i>  | diff        | lwr       | upr       | p adj     |
|--------------|-------------|-----------|-----------|-----------|
| Diff.-i.c.i. | -0.81817253 | -2.504026 | 0.8676814 | 0.4079465 |
| Exp.-i.c.i.  | -0.50543760 | -2.191292 | 1.1804163 | 0.7356101 |
| Ref.-i.c.i.  | -0.91155115 | -2.597405 | 0.7743028 | 0.3300799 |
| Exp.-Diff.   | 0.31273493  | -1.373119 | 1.9985889 | 0.9145461 |
| Ref.-Diff.   | -0.09337862 | -1.779233 | 1.5924753 | 0.9972238 |
| Ref.-Exp.    | -0.40611355 | -2.091967 | 1.2797404 | 0.8370240 |

## multiple comparisons - Individuals

| <i>BMI1</i> | diff       | lwr       | upr       | p adj     |
|-------------|------------|-----------|-----------|-----------|
| #2-#1       | -0.5619701 | -1.856029 | 0.7320884 | 0.4298008 |
| #3-#1       | -0.1639206 | -1.457979 | 1.1301379 | 0.9211661 |
| #3-#2       | 0.3980495  | -0.896009 | 1.6921080 | 0.6351379 |

| <i>NOTCH1</i> | Df | Sum Sq  | Mean Sq | F value | Pr(>F) |
|---------------|----|---------|---------|---------|--------|
| Medium        | 3  | 1.7409  | 0.5803  | 0.1191  | 0.9455 |
| Individuals   | 2  | 0.1425  | 0.0712  | 0.0146  | 0.9855 |
| Residuals     | 6  | 29.2271 | 4.8712  |         |        |

## multiple comparisons - Medium

| <i>NOTCH1</i> | diff        | lwr       | upr      | p adj     |
|---------------|-------------|-----------|----------|-----------|
| Diff.-i.c.i.  | 0.93646706  | -5.301773 | 7.174707 | 0.9512749 |
| Exp.-i.c.i.   | 0.92653179  | -5.311708 | 7.164772 | 0.9526681 |
| Ref.-i.c.i.   | 0.57200384  | -5.666236 | 6.810244 | 0.9878426 |
| Exp.-Diff.    | -0.00993527 | -6.248176 | 6.228305 | 0.9999999 |
| Ref.-Diff.    | -0.36446322 | -6.602703 | 5.873777 | 0.9967495 |
| Ref.-Exp.     | -0.35452795 | -6.592768 | 5.883712 | 0.9970045 |

## multiple comparisons - Individuals

| <i>NOTCH1</i> | diff        | lwr       | upr      | p adj     |
|---------------|-------------|-----------|----------|-----------|
| #2-#1         | -0.26272963 | -5.051192 | 4.525733 | 0.9845374 |
| #3-#1         | -0.17210072 | -4.960563 | 4.616362 | 0.9933255 |
| #3-#2         | 0.09062891  | -4.697833 | 4.879091 | 0.9981431 |



Table S6 (continued)

| <i>PROM1</i> | Df | Sum Sq | Mean Sq | F value | Pr(>F) |
|--------------|----|--------|---------|---------|--------|
| Medium       | 3  | 0.1982 | 0.06605 | 0.0701  | 0.9738 |
| Individuals  | 2  | 0.6922 | 0.34611 | 0.3674  | 0.7071 |
| Residuals    | 6  | 5.6530 | 0.94217 |         |        |

## multiple comparisons - Medium

| <i>PROM1</i> | diff        | lwr       | upr      | p adj     |
|--------------|-------------|-----------|----------|-----------|
| Diff.-i.c.i. | 0.10788196  | -2.635652 | 2.851415 | 0.9989965 |
| Exp.-i.c.i.  | -0.20140074 | -2.944934 | 2.542133 | 0.9936361 |
| Ref.-i.c.i.  | -0.18069289 | -2.924226 | 2.562841 | 0.9953720 |
| Exp.-Diff.   | -0.30928270 | -3.052816 | 2.434251 | 0.9780317 |
| Ref.-Diff.   | -0.28857485 | -3.032108 | 2.454959 | 0.9819640 |
| Ref.-Exp.    | 0.02070785  | -2.722826 | 2.764241 | 0.9999928 |

## multiple comparisons - Individuals

| <i>PROM1</i> | diff       | lwr       | upr      | p adj     |
|--------------|------------|-----------|----------|-----------|
| #2-#1        | 0.5860641  | -1.519867 | 2.691996 | 0.6861910 |
| #3-#1        | 0.2485591  | -1.857372 | 2.354491 | 0.9310686 |
| #3-#2        | -0.3375050 | -2.443437 | 1.768426 | 0.8777859 |

| <i>VIL1</i> | Df | Sum Sq  | Mean Sq | F value | Pr(>F)      |
|-------------|----|---------|---------|---------|-------------|
| Medium      | 3  | 22.2150 | 7.4050  | 18.8676 | 0.001855 ** |
| Individuals | 2  | 0.8182  | 0.4091  | 1.0424  | 0.408746    |
| Residuals   | 6  | 2.3548  | 0.3925  |         |             |

## multiple comparisons - Medium

| <i>VIL1</i>  | diff       | lwr       | upr       | p adj     |
|--------------|------------|-----------|-----------|-----------|
| Diff.-i.c.i. | 3.1139296  | -4.884650 | -1.343210 | 0.0036284 |
| Exp.-i.c.i.  | -2.9015377 | -4.672258 | -1.130818 | 0.0052102 |
| Ref.-i.c.i.  | -3.3475266 | -5.118247 | -1.576807 | 0.0024865 |
| Exp.-Diff.   | 0.2123919  | -1.558328 | 1.983112  | 0.9738231 |
| Ref.-Diff.   | -0.2335970 | -2.004317 | 1.537123  | 0.9658403 |
| Ref.-Exp.    | -0.4459889 | -2.216709 | 1.324731  | 0.8192909 |

## multiple comparisons - Individuals

| <i>VIL1</i> | diff      | lwr        | upr      | p adj     |
|-------------|-----------|------------|----------|-----------|
| #2-#1       | -0.312494 | -1.6716959 | 1.046707 | 0.7693514 |
| #3-#1       | 0.327062  | -1.0321392 | 1.686264 | 0.7512342 |
| #3-#2       | 0.639557  | -0.7196448 | 1.998758 | 0.3792827 |

**Table S7: Statistical analysis of colonic organoids in different media**

Two-way ANOVA, Tukey multiple comparisons of mean, 95 % family-wise confidence level; i.c.i., initial cell isolates; Exp., expansion medium; Diff., differentiation medium; Ref., refined medium; code: 0 \*\*\* 0.001 \*\* 0.01 \* 0.05 . 0.1

| <b>LGR5</b>        | <b>Df</b> | <b>Sum Sq</b> | <b>Mean Sq</b> | <b>F value</b> | <b>Pr(&gt;F)</b> |
|--------------------|-----------|---------------|----------------|----------------|------------------|
| <b>Medium</b>      | 3         | 26.2825       | 8.7608         | 3.1277         | 0.1090           |
| <b>Individuals</b> | 2         | 9.5059        | 4.7529         | 1.6968         | 0.2606           |
| <b>Residuals</b>   | 6         | 16.8062       | 2.8010         |                |                  |

**multiple comparisons - Medium**

| <b>LGR5</b>         | <b>diff</b> | <b>lwr</b> | <b>upr</b> | <b>p adj</b> |
|---------------------|-------------|------------|------------|--------------|
| <b>Diff.-i.c.i.</b> | 0.2086861   | -4.5217908 | 4.939163   | 0.9985868    |
| <b>Exp.-i.c.i.</b>  | -2.8736011  | -7.6040780 | 1.856876   | 0.2526962    |
| <b>Ref.-i.c.i.</b>  | 1.0531542   | -3.6773227 | 5.783631   | 0.8649645    |
| <b>Exp.-Diff.</b>   | -3.0822872  | -7.8127640 | 1.648190   | 0.2108279    |
| <b>Ref.-Diff.</b>   | 0.8444681   | -3.8860088 | 5.574945   | 0.9226583    |
| <b>Ref.-Exp.</b>    | 3.9267553   | -0.8037216 | 8.657232   | 0.1001101    |

**multiple comparisons - Individuals**

| <b>LGR5</b>  | <b>diff</b> | <b>lwr</b> | <b>upr</b> | <b>p adj</b> |
|--------------|-------------|------------|------------|--------------|
| <b>#2-#1</b> | 1.758482    | -1.872624  | 5.389588   | 0.3613051    |
| <b>#3-#1</b> | 1.995264    | -1.635842  | 5.626370   | 0.2848942    |
| <b>#3-#2</b> | 0.236782    | -3.394324  | 3.867888   | 0.9782524    |

| <b>NEUROG3</b>     | <b>Df</b> | <b>Sum Sq</b> | <b>Mean Sq</b> | <b>F value</b> | <b>Pr(&gt;F)</b> |
|--------------------|-----------|---------------|----------------|----------------|------------------|
| <b>Medium</b>      | 3         | 116.046       | 38.682         | 9.0616         | 0.01202 *        |
| <b>Individuals</b> | 2         | 7.246         | 3.623          | 0.8487         | 0.47362          |
| <b>Residuals</b>   | 6         | 25.612        | 4.269          |                |                  |

**multiple comparisons - Medium**

| <b>NEUROG3</b>      | <b>diff</b> | <b>lwr</b> | <b>upr</b> | <b>p adj</b> |
|---------------------|-------------|------------|------------|--------------|
| <b>Diff.-i.c.i.</b> | 2.4722754   | -3.367491  | 8.3120415  | 0.5090485    |
| <b>Exp.-i.c.i.</b>  | -5.2677304  | -11.107497 | 0.5720357  | 0.0743561    |
| <b>Ref.-i.c.i.</b>  | 2.2147303   | -3.625036  | 8.0544964  | 0.5881030    |
| <b>Exp.-Diff.</b>   | -7.7400058  | -13.579772 | -1.9002397 | 0.0146759    |
| <b>Ref.-Diff.</b>   | -0.2575451  | -6.097311  | 5.5822210  | 0.9985881    |
| <b>Ref.-Exp.</b>    | 7.4824607   | 1.642695   | 13.3222268 | 0.0171722    |

**multiple comparisons - Individuals**

| <b>NEUROG3</b> | <b>diff</b> | <b>lwr</b> | <b>upr</b> | <b>p adj</b> |
|----------------|-------------|------------|------------|--------------|
| <b>#2-#1</b>   | -0.1272758  | -4.609870  | 4.355318   | 0.9958273    |
| <b>#3-#1</b>   | 1.5810301   | -2.901564  | 6.063624   | 0.5580088    |
| <b>#3-#2</b>   | 1.7083059   | -2.774288  | 6.190900   | 0.5113629    |

Table S7 (continued)

| <i>CHGA</i> | Df | Sum Sq  | Mean Sq | F value | Pr(>F)      |
|-------------|----|---------|---------|---------|-------------|
| Medium      | 3  | 140.348 | 46.783  | 16.8359 | 0.002512 ** |
| Individuals | 2  | 4.306   | 2.153   | 0.7749  | 0.501940    |
| Residuals   | 6  | 16.673  | 2.779   |         |             |

## multiple comparisons - Medium

| <i>CHGA</i>  | diff      | lwr        | upr       | p adj     |
|--------------|-----------|------------|-----------|-----------|
| Diff.-i.c.i. | -3.168514 | -7.880132  | 1.543104  | 0.1933241 |
| Exp.-i.c.i.  | -8.899055 | -13.610672 | -4.187437 | 0.0024986 |
| Ref.-i.c.i.  | -1.172461 | -5.884079  | 3.539157  | 0.8242425 |
| Exp.-Diff.   | -5.730540 | -10.442158 | -1.018922 | 0.0217627 |
| Ref.-Diff.   | 1.996054  | -2.715564  | 6.707672  | 0.5085394 |
| Ref.-Exp.    | 7.726594  | 3.014976   | 12.438212 | 0.0051896 |

## multiple comparisons - Individuals

| <i>CHGA</i> | diff     | lwr       | upr      | p adj     |
|-------------|----------|-----------|----------|-----------|
| #2-#1       | 1.139112 | -2.477518 | 4.755742 | 0.6223666 |
| #3-#1       | 1.370639 | -2.245991 | 4.987269 | 0.5147721 |
| #3-#2       | 0.231527 | -3.385103 | 3.848157 | 0.9790290 |

| <i>MUC2</i> | Df | Sum Sq  | Mean Sq | F value | Pr(>F)      |
|-------------|----|---------|---------|---------|-------------|
| Medium      | 3  | 294.954 | 98.318  | 16.3704 | 0.002705 ** |
| Individuals | 2  | 69.844  | 34.922  | 5.8146  | 0.039423 *  |
| Residuals   | 6  | 36.035  | 6.006   |         |             |

## multiple comparisons - Medium

| <i>MUC2</i>  | diff       | lwr        | upr        | p adj     |
|--------------|------------|------------|------------|-----------|
| Diff.-i.c.i. | -7.727649  | -14.654442 | -0.8008552 | 0.0317877 |
| Exp.-i.c.i.  | -13.586190 | -20.512984 | -6.6593969 | 0.0020460 |
| Ref.-i.c.i.  | -4.410550  | -11.337343 | 2.5162440  | 0.2241440 |
| Exp.-Diff.   | -5.858542  | -12.785335 | 1.0682519  | 0.0937952 |
| Ref.-Diff.   | 3.317099   | -3.609694  | 10.2438928 | 0.4177941 |
| Ref.-Exp.    | 9.175641   | 2.248847   | 16.1024344 | 0.0147141 |

## multiple comparisons - Individuals

| <i>MUC2</i> | diff      | lwr        | upr       | p adj     |
|-------------|-----------|------------|-----------|-----------|
| #2-#1       | 5.896619  | 0.5796244  | 11.213614 | 0.0333325 |
| #3-#1       | 2.610940  | -2.7060548 | 7.927934  | 0.3526861 |
| #3-#2       | -3.285679 | -8.6026738 | 2.031315  | 0.2198710 |

Table S7 (continued)

| <b>ASCL2</b> | <b>Df</b> | <b>Sum Sq</b> | <b>Mean Sq</b> | <b>F value</b> | <b>Pr(&gt;F)</b> |
|--------------|-----------|---------------|----------------|----------------|------------------|
| Medium       | 3         | 39.682        | 13.2272        | 5.7120         | 0.03423 *        |
| Individuals  | 2         | 0.774         | 0.3871         | 0.1672         | 0.84986          |
| Residuals    | 6         | 13.894        | 2.3157         |                |                  |

## multiple comparisons - Medium

| <b>ASCL2</b> | <b>diff</b> | <b>lwr</b> | <b>upr</b> | <b>p adj</b> |
|--------------|-------------|------------|------------|--------------|
| Diff.-i.c.i. | 4.5324837   | 0.2313096  | 8.833658   | 0.0404105    |
| Exp.-i.c.i.  | 1.4989514   | -2.8022227 | 5.800126   | 0.6452220    |
| Ref.-i.c.i.  | 3.8590898   | -0.4420843 | 8.160264   | 0.0758444    |
| Exp.-Diff.   | -3.0335323  | -7.3347064 | 1.267642   | 0.1686391    |
| Ref.-Diff.   | -0.6733939  | -4.9745681 | 3.627780   | 0.9454069    |
| Ref.-Exp.    | 2.3601384   | -1.9410358 | 6.661312   | 0.3198500    |

## multiple comparisons - Individuals

| <b>ASCL2</b> | <b>diff</b> | <b>lwr</b> | <b>upr</b> | <b>p adj</b> |
|--------------|-------------|------------|------------|--------------|
| #2-#1        | 0.52648460  | -2.775089  | 3.828058   | 0.8789002    |
| #3-#1        | 0.55041363  | -2.751160  | 3.851987   | 0.8686637    |
| #3-#2        | 0.02392903  | -3.277645  | 3.325503   | 0.9997274    |

| <b>EPHB2</b> | <b>Df</b> | <b>Sum Sq</b> | <b>Mean Sq</b> | <b>F value</b> | <b>Pr(&gt;F)</b> |
|--------------|-----------|---------------|----------------|----------------|------------------|
| Medium       | 3         | 6.4322        | 2.14406        | 5.2372         | 0.04108 *        |
| Individuals  | 2         | 0.1506        | 0.07530        | 0.1839         | 0.83652          |
| Residuals    | 6         | 2.4564        | 0.40939        |                |                  |

## multiple comparisons - Medium

| <b>EPHB2</b> | <b>diff</b> | <b>lwr</b>  | <b>upr</b> | <b>p adj</b> |
|--------------|-------------|-------------|------------|--------------|
| Diff.-i.c.i. | 0.3301723   | -1.47831593 | 2.1386605  | 0.9180054    |
| Exp.-i.c.i.  | -1.3531360  | -3.16162424 | 0.4553522  | 0.1409258    |
| Ref.-i.c.i.  | 0.5176058   | -1.29088246 | 2.3260940  | 0.7601687    |
| Exp.-Diff.   | -1.6833083  | -3.49179654 | 0.1251799  | 0.0661121    |
| Ref.-Diff.   | 0.1874335   | -1.62105476 | 1.9959217  | 0.9827098    |
| Ref.-Exp.    | 1.8707418   | 0.06225355  | 3.6792300  | 0.0436101    |

## multiple comparisons - Individuals

| <b>EPHB2</b> | <b>diff</b> | <b>lwr</b> | <b>upr</b> | <b>p adj</b> |
|--------------|-------------|------------|------------|--------------|
| #2-#1        | 0.07108868  | -1.317104  | 1.459281   | 0.9865122    |
| #3-#1        | 0.26506998  | -1.123122  | 1.653262   | 0.8324739    |
| #3-#2        | 0.19398130  | -1.194211  | 1.582174   | 0.9051761    |

Table S7 (continued)

| <i>BMI1</i> | Df | Sum Sq  | Mean Sq | F value | Pr(>F)    |
|-------------|----|---------|---------|---------|-----------|
| Medium      | 3  | 1.62206 | 0.54069 | 5.1498  | 0.04254 * |
| Individuals | 2  | 0.50506 | 0.25253 | 2.4052  | 0.17097   |
| Residuals   | 6  | 0.62995 | 0.10499 |         |           |

## multiple comparisons - Medium

| <i>BMI1</i>  | diff       | lwr        | upr        | p adj     |
|--------------|------------|------------|------------|-----------|
| Diff.-i.c.i. | -0.4571877 | -1.3730342 | 0.45865887 | 0.3872676 |
| Exp.-i.c.i.  | -1.0014269 | -1.9172735 | -0.0855804 | 0.0346232 |
| Ref.-i.c.i.  | -0.7112813 | -1.6271279 | 0.20456519 | 0.1251251 |
| Exp.-Diff.   | -0.5442393 | -1.4600858 | 0.37160725 | 0.2666303 |
| Ref.-Diff.   | -0.2540937 | -1.1699402 | 0.66175285 | 0.7757058 |
| Ref.-Exp.    | 0.2901456  | -0.6257009 | 1.20599213 | 0.7043471 |

## multiple comparisons - Individuals

| <i>BMI1</i> | diff       | lwr        | upr       | p adj     |
|-------------|------------|------------|-----------|-----------|
| #2-#1       | 0.2005821  | -0.5024201 | 0.9035843 | 0.6739345 |
| #3-#1       | -0.2987368 | -1.0017390 | 0.4042654 | 0.4434886 |
| #3-#2       | -0.4993189 | -1.2023211 | 0.2036833 | 0.1536914 |

| <i>NOTCH1</i> | Df | Sum Sq | Mean Sq | F value | Pr(>F) |
|---------------|----|--------|---------|---------|--------|
| Medium        | 3  | 5.9351 | 1.97835 | 3.2214  | 0.1037 |
| Individuals   | 2  | 0.2126 | 0.10631 | 0.1731  | 0.8451 |
| Residuals     | 6  | 3.6848 | 0.61413 |         |        |

## multiple comparisons - Medium

| <i>NOTCH1</i> | diff       | lwr        | upr       | p adj     |
|---------------|------------|------------|-----------|-----------|
| Diff.-i.c.i.  | 1.4992568  | -0.7157564 | 3.7142699 | 0.1898429 |
| Exp.-i.c.i.   | -0.3131459 | -2.5281591 | 1.9018672 | 0.9586432 |
| Ref.-i.c.i.   | 0.7631995  | -1.4518136 | 2.9782126 | 0.6525893 |
| Exp.-Diff.    | -1.8124027 | -4.0274158 | 0.4026104 | 0.1051774 |
| Ref.-Diff.    | -0.7360573 | -2.9510704 | 1.4789559 | 0.6754961 |
| Ref.-Exp.     | 1.0763454  | -1.1386677 | 3.2913586 | 0.4070133 |

## multiple comparisons - Individuals

| <i>NOTCH1</i> | diff       | lwr       | upr      | p adj     |
|---------------|------------|-----------|----------|-----------|
| #2-#1         | 0.1904815  | -1.509759 | 1.890722 | 0.9376041 |
| #3-#1         | -0.1339348 | -1.834175 | 1.566305 | 0.9684763 |
| #3-#2         | -0.3244164 | -2.024657 | 1.375824 | 0.8326907 |

Table S7 (continued)

| <i>PROM1</i> | Df | Sum Sq | Mean Sq | F value | Pr(>F)    |
|--------------|----|--------|---------|---------|-----------|
| Medium       | 3  | 6.0498 | 2.01661 | 3.6915  | 0.08137 . |
| Individuals  | 2  | 4.8039 | 2.40193 | 4.3969  | 0.06671 . |
| Residuals    | 6  | 3.2777 | 0.54628 |         |           |

## multiple comparisons - Medium

| <i>PROM1</i> | diff       | lwr       | upr       | p adj     |
|--------------|------------|-----------|-----------|-----------|
| Diff.-i.c.i. | -1.3063555 | -3.395425 | 0.7827138 | 0.2349027 |
| Exp.-i.c.i.  | -1.9158485 | -4.004918 | 0.1732208 | 0.699143  |
| Ref.-i.c.i.  | -1.4400190 | -3.529088 | 0.6490503 | 0.1802548 |
| Exp.-Diff.   | -0.6094929 | -2.698562 | 1.4795763 | 0.7502190 |
| Ref.-Diff.   | -0.1336635 | -2.222733 | 1.9554058 | 0.9957500 |
| Ref.-Exp.    | 0.4758294  | -1.613240 | 2.5648987 | 0.8573153 |

## multiple comparisons - Individuals

| <i>PROM1</i> | diff       | lwr        | upr        | p adj     |
|--------------|------------|------------|------------|-----------|
| #2-#1        | 0.7097294  | -0.8938366 | 2.31329529 | 0.4178180 |
| #3-#1        | -0.8383094 | -2.4418753 | 0.76525655 | 0.3144299 |
| #3-#2        | -1.5480387 | -3.1516047 | 0.05552718 | 0.0570207 |

| <i>VIL1</i> | Df | Sum Sq  | Mean Sq | F value | Pr(>F)      |
|-------------|----|---------|---------|---------|-------------|
| Medium      | 3  | 16.9034 | 5.6345  | 12.2278 | 0.005746 ** |
| Individuals | 2  | 3.5977  | 1.7989  | 3.9039  | 0.082051    |
| Residuals   | 6  | 2.7647  | 0.4608  |         |             |

## multiple comparisons - Medium

| <i>VIL1</i>  | diff       | lwr       | upr       | p adj     |
|--------------|------------|-----------|-----------|-----------|
| Diff.-i.c.i. | -2.4805094 | -4.399165 | -0.561854 | 0.0164759 |
| Exp.-i.c.i.  | -2.7677175 | -4.686373 | -0.849062 | 0.0098042 |
| Ref.-i.c.i.  | -2.9055920 | -4.824248 | -0.986936 | 0.0077294 |
| Exp.-Diff.   | -0.2872080 | -2.205864 | 1.631448  | 0.9516488 |
| Ref.-Diff.   | -0.4250826 | -2.343738 | 1.493573  | 0.8665487 |
| Ref.-Exp.    | -0.1378745 | -2.056530 | 1.780781  | 0.9940217 |

## multiple comparisons - Individuals

| <i>VIL1</i> | diff      | lwr       | upr      | p adj     |
|-------------|-----------|-----------|----------|-----------|
| #2-#1       | 0.243242  | -1.229514 | 1.715999 | 0.8708792 |
| #3-#1       | -1.020649 | -2.493405 | 0.452108 | 0.1644002 |
| #3-#2       | -1.263891 | -2.736648 | 0.208866 | 0.0861859 |
