# Supplementary material for: Generation of Differentiating and Long-Living Intestinal Organoids Reflecting the Cellular Diversity of Canine Intestine
Source: MDPI journal article supplement (doi:10.3390/cells9040822), 2020-03-28
Supplement: s1 [file s1]

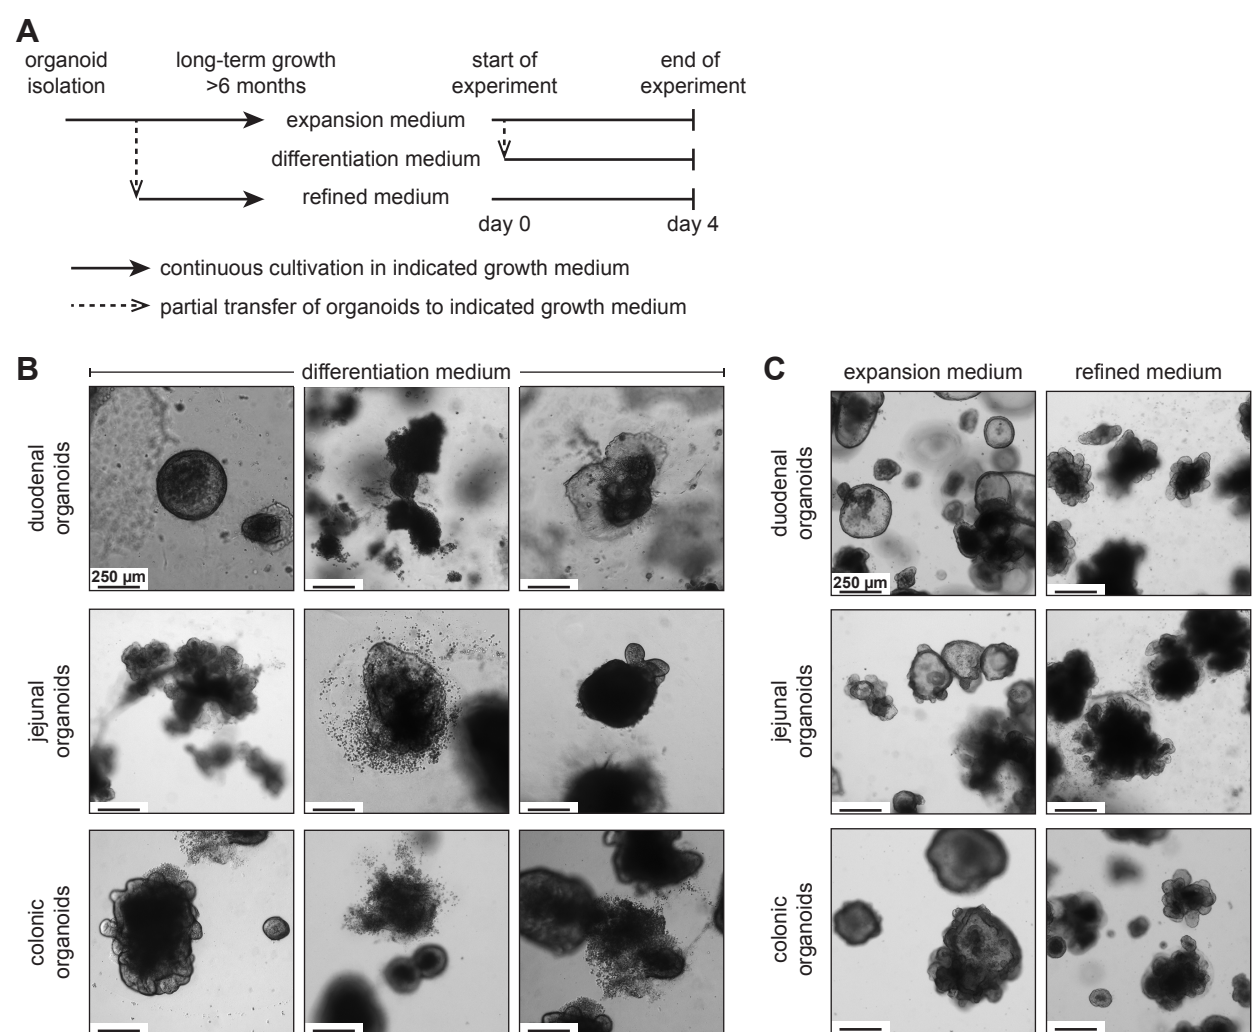

**Figure S1. Cultivation scheme of organoids and images of organoids in differentiation medium and after prolonged cultivation in expansion and refined medium.**

**(A)** Outline of cultivation scheme. Duodenal, jejunal and colonic organoids were initially isolated using expansion medium and were partially transferred to refined medium for long-term cultivation; for experiments organoids grown in expansion medium were partially transferred to differentiation medium and cultivated in parallel with expansion and refined medium until harvesting for various assays four days afterwards. **(B)** Light microscopic images of duodenal, jejunal and colonic organoids in differentiation medium from various experiments four days after seeding; scale bar represents 250  $\mu$ m. **(C)** Light microscopic images of organoids derived from duodenum, jejunum and colon cultivated for 25 passages in refined medium and expansion medium four days after seeding; scale bars represent 250  $\mu$ m.

**A**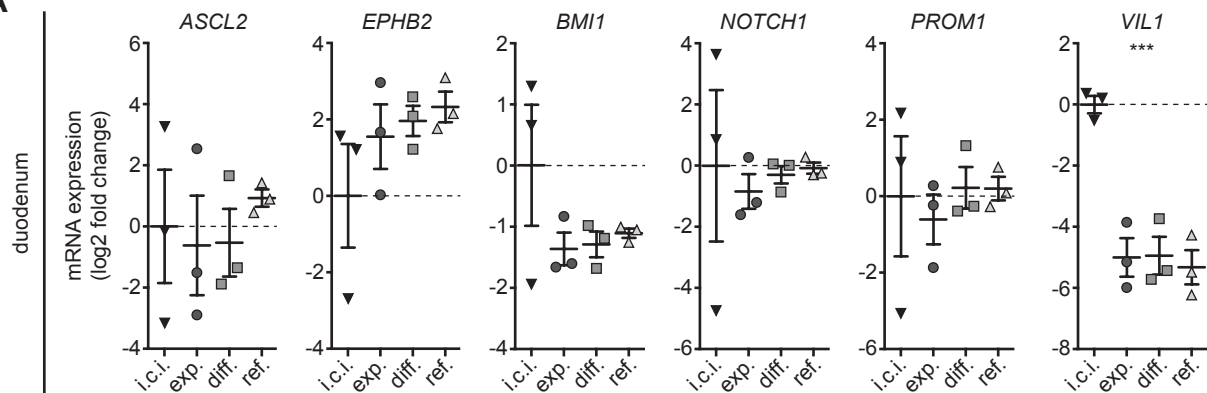**B**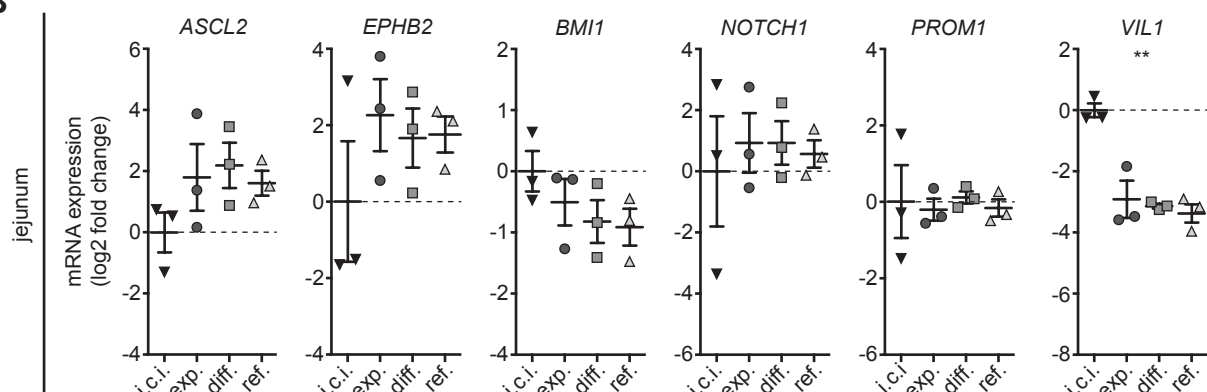**C**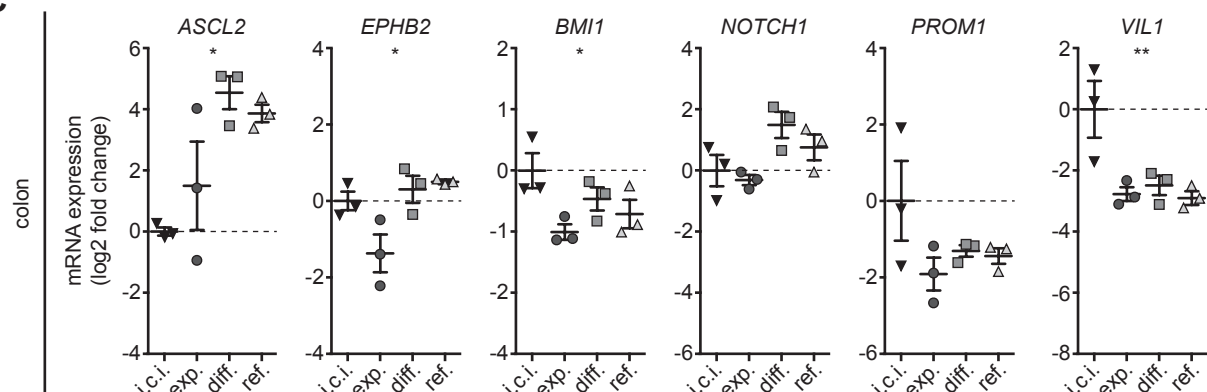

**Figure S2. Gene expression of stem cell marker is increased in colonic organoids.**

(A-C) Individual scatter dot plots of gene expression data from Figure 2A shown for stem cell marker *ASCL2*, *EPHB2*, *NOTCH1*, *BMI1*, *PROM1* and the enterocyte marker *VIL1* for organoids derived from duodenum (A), jejunum (B) and colon (C) four days after seeding; mean is shown, whiskers are SEM; \*  $p < 0.05$ , \*\*  $p < 0.01$  and \*\*\*  $p < 0.001$ , statistical analysis given in detail in Supplementary Table S5-S7;  $n = 3$  dogs; i.c.i., initial cell isolates; exp., expansion medium; diff., differentiation medium; ref., refined medium.

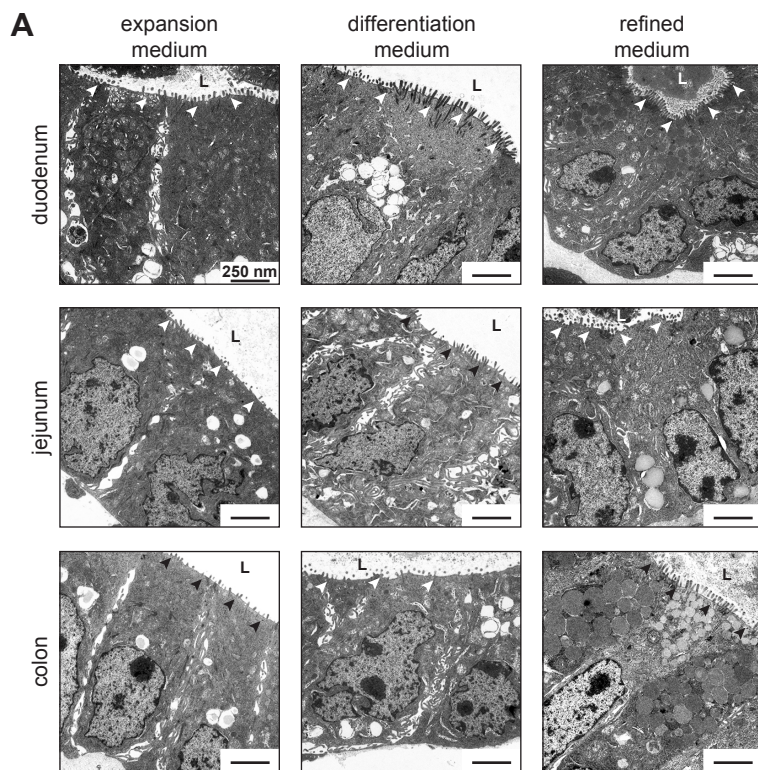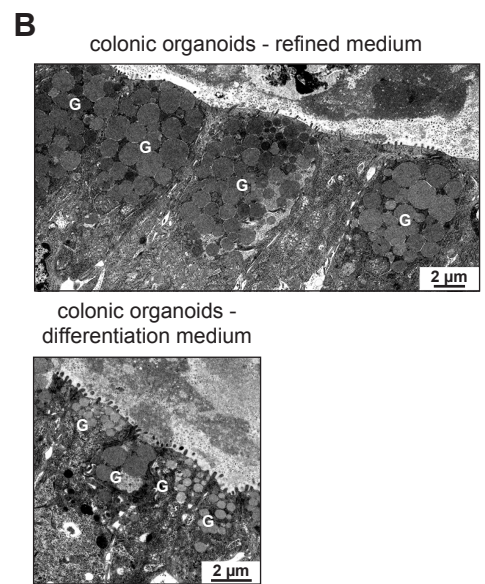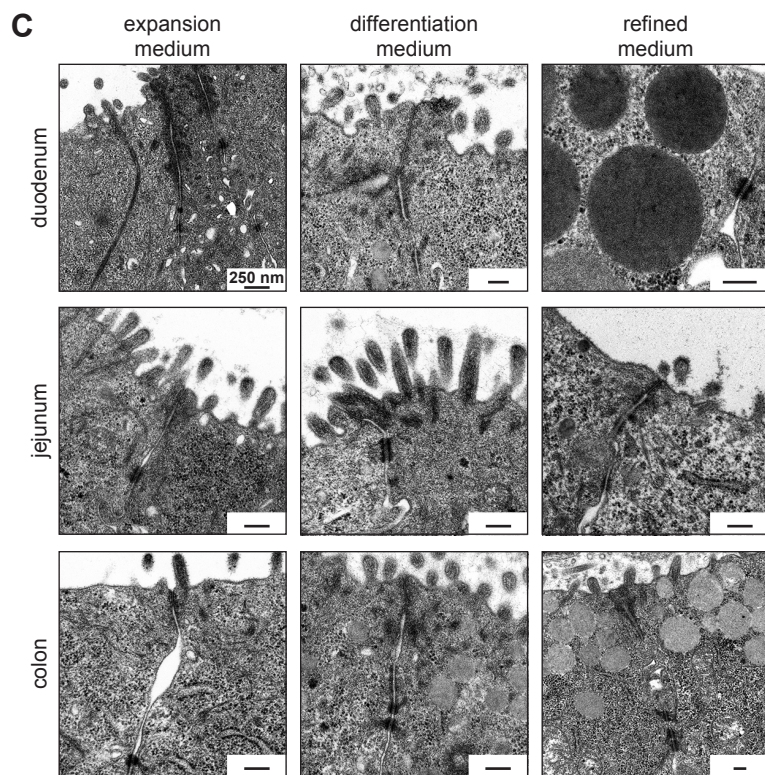

**Figure S3. TEM images of microvilli and cell-cell junctions in all conditions and goblet cells in organoids cultivated in differentiation and refined medium.**

**(A)** Representative TEM images of microvilli (arrowheads) in organoids of all conditions from Figure 3B; L, lumen; scale bar represents 250 nm. **(B)** Representative TEM images of colonic organoids in differentiation and refined medium from Figure 3B; G, goblet cells; scale bar represents 2  $\mu$ m. **(C)** TEM images depicting tight junctions, adherens junctions and desmosomes of organoids from Figure 3B; scale bars represent 250 nm.
